# Supplementary material for: A 3D four-fold interpenetrated conductive metal–organic framework for fast and robust sodium-ion storage
Source: PubMed Central journal article supplement — Chem Sci. 2025 Jan 8;16(6):2810–8. doi: 10.1039/d4sc07400a (PMC11726320; doi:10.1039/d4sc07400a), 2025-01-08
Supplement: SC-OLF-D4SC07400A-s001.pdf [file SC-OLF-D4SC07400A-s001.pdf]

## Supporting Information

### **A 3D Four-Fold Interpenetrated Conductive Metal-Organic Framework for Fast and Robust Sodium-Ion Storage**

*Zhaoli Liu, Juan Chu, Linqi Cheng, Junhao Wang, Chongyi Zhang, Cheng Zhang, Fengchao Cui, \* Heng-Guo Wang,\* and Guangshan Zhu*

Key Laboratory of Polyoxometalate and Reticular Material Chemistry of Ministry of Education and Faculty of Chemistry, Northeast Normal University, Changchun, 130024, P. R. China.

\*Corresponding authors.

E-mail: cuifc705@nenu.edu.cn; wanghg061@nenu.edu.cn

## **Table of Contents**

|                                                            |           |
|------------------------------------------------------------|-----------|
| <b>Section S1. Experimental Section .....</b>              | <b>3</b>  |
| 1.1 Materials                                              |           |
| 1.2 Synthesis of samples                                   |           |
| 1.3 Material characterizations                             |           |
| 1.4 Assembly of batteries and electrochemical measurements |           |
| <b>Section S2. Calculation Section .....</b>               | <b>5</b>  |
| 2.1 Calculations of charge storage kinetics                |           |
| 2.2 DFT computational methods                              |           |
| <b>Section S3. Results and Discussion .....</b>            | <b>7</b>  |
| <b>Section S4. References.....</b>                         | <b>34</b> |

## **Section S1. Experimental section**

### **1.1 Materials**

Anhydrous ethanol, acetone, isopropanol, and *N, N*-dimethylformamide (DMF) were purchased from Innochem.  $\text{Cu}(\text{OAc})_2$ , disodium terephthalate (NaTP) and 2,3,6,7,10,11-hexahydroxytriphenylene (HHTP) were purchased from Energy Chemical. Dibenzo-[g,p]chrysene-2,3,6,7,10,11,14,15-octaol (8OH-DBC) were purchased from Jilin Chinese Academy of Sciences-Yanshen Technology Co., Ltd. All reagents were obtained from commercial sources and used without further purification.

### **1.2 Synthesis of samples**

Cu-DBC was synthesized according to the literature by a solvothermal method.<sup>1</sup> A schlenk tube was charged with  $\text{Cu}(\text{OAc})_2$  (9 mg), dibenzo-[g,p]chrysene-2,3,6,7,10,11,14,15-octaol (12.9 mg), 750  $\mu\text{L}$  DMF and 3 mL deionized water. After approximately 20 min of ultrasonic treatment, the tube was subjected to three freeze-pump-thaw cycles, evacuated to vacuum and sealed. Then, the tube was placed in an oven with a temperature of 85 °C for 72 h. A dark blue precipitate was isolated by filtration, followed by washing with deionized water and acetone several times and dried overnight in a vacuum at room temperature.

Cu-HHTP was synthesized according to the literature by solvothermal method.<sup>2</sup> A vial was charged with  $\text{Cu}(\text{OAc})_2$  (17.8 mg), 2,3,6,7,10,11-hexahydroxytriphenylene (19.5 mg), 2 mL isopropanol and 2 mL deionized water. After approximately 20 min of ultrasonic treatment, the vial was placed in an oven with a temperature of 85 °C for 15 h. A dark product was obtained by filtration and washing with water, ethanol, and acetone. Finally, the product was dried overnight in a vacuum at 60 °C.

### **1.3 Material characterizations**

TEM images were performed by JEM-2100F. SEM images were performed by HITACHI SU8010. Powder X-ray diffraction (XRD) measurements were tested on Smartlab (Cu  $K\alpha$ -radiation,  $\lambda=0.15405$  nm, 40 kV, 30 mA). FT-IR spectra were determined by TJ270-30A. UV-

vis spectra were measured by Shimadzu UV-2550 spectrophotometer within 300-800nm wavelength range. TGA curves were carried out on DSC 200 F3 between 25 and 800 °C at 12 °C min<sup>-1</sup> under air and N<sub>2</sub> atmosphere. The N<sub>2</sub> adsorption-desorption isotherms were determined at 77 K by using a Quantachrome Autosorb iQ apparatus. The electrodes were analyzed by X-ray photoelectron spectroscopy (XPS, Thermo ESCALAB 250) while all binding energies had to be corrected with C 1s.

#### **1.4 Assembly of batteries and electrochemical measurements**

The Cu-DBC or Cu-HHTP cathodes were prepared by casting the slurry, which is composed of Cu-DBC or Cu-HHTP, acetylene black, and sodium carboxymethyl cellulose (CMC) in weight ratio of 6:3:1 or 8:1:1 with deionized water, onto aluminum foil. The disodium terephthalate (NaTP) anode was prepared by casting the slurry, which is composed of NaTP, acetylene black, and polyvinylidene fluoride (PVDF) in a weight ratio of 6:3:1 with N-methyl-2-pyrrolidone (NMP), onto copper foil. The above electrodes were dried at 80 °C in an oven for 12 h. Cu-DBC or Cu-HHTP cathodes load the active material of more than 0.5 mg cm<sup>-2</sup>.

The electrochemical tests of half-cells and full-cells were performed using 2025 coin-type cells assembled in an Ar-filled glove box. The cathode (or anode) of half cells were assembled containing Cu-DBC/Cu-HHTP (or NaTP) electrodes, 1M NaPF<sub>6</sub> in DME as the electrolyte (100 μL), Na metal as the counter electrode and glass fiber (Whatman GF-A) as the separator. The full cell was fabricated using a similar method with that used for the cathode of half cells, except that the pre-sodiated NaTP anode was used instead of Na metal.

Cyclic voltammetry (CVs) measurements were tested by CHI600E electrochemical workstation with the voltage range of 1.0-3.5 V. Electrochemical measurements were performed using the NEWARE battery system with the voltage range of 1.0-3.5 V. Electrochemical impedance spectroscopy (EIS) tests were conducted over a frequency range of 100 kHz-0.1 Hz. The chemical diffusion coefficient of Na<sup>+</sup> ions was tested by galvanostatic intermittent titration technique (GITT) at a current density of 0.05 A g<sup>-1</sup> for 10 min followed by

30 min of relaxation.  $D_S = \frac{4}{\pi\tau} \left( \frac{n_m V_m}{S} \right)^2 \left( \frac{\Delta E_s}{\Delta E_t} \right)^2$ ,  $\tau$  is a relaxation time;  $n_m$  is the number of moles, and the  $V_m$  is the molar volume of the electrode material, and  $S$  is an electrode contact area, and  $\Delta E_s$  is a voltage change caused by pulses,  $\Delta E_t$  is the voltage change of constant current charge and discharge.

## Section S2. Calculation Section

### 2.1 Calculations of charge storage kinetics

Kinetics can be analyzed using the equation below:

$$i = av^b \quad (1)$$

where  $i$  is the peak current and  $v$  is the scan rate based on the CV curves.

The capacitive contribution can be calculated by the following equation:

$$i = k_1v + k_2v^{1/2} \quad (2)$$

where  $i$ ,  $k_1v$ , and  $k_2v^{1/2}$  represent current, capacitive, and ionic diffusion contributions, respectively.

### 2.2 DFT computational methods

The quantum chemical calculation of the electronic structure of Cu-DBC fragments was performed by Gaussian 16 package<sup>3</sup> under B3LYP<sup>4, 5</sup>/def2-TZVP<sup>6</sup> level. Electronic structure analyses were conducted using Multiwfn<sup>7</sup> and VMD<sup>8</sup> software.

First-principles calculations for simplified Cu-DBC unit cells have been implemented in the Vienna Ab initio Simulation Package (VASP)<sup>9, 10</sup>. Projector augmented wave (PAW)<sup>11</sup> method was employed to describe core-valence interaction with plane wave cut-off energy of 500 eV. The generalized gradient approximation with the Perdew-Burke-Ernzerhof functional (GGA-PBE)<sup>12</sup> was used to describe the exchange-correlation potential of the electrons. Spin polarization calculations was performed for all simulations with the consideration of empirical dispersions of Grimme (DFT-D3)<sup>13</sup> for the long-range vdW interactions. For an accurate description of the localized d electrons of Cu, the on-site Coulomb interaction was added to the

d orbital of Cu with a U value of 4.0 eV using the rotationally invariant approach of Liechtenstein et al.<sup>14, 15</sup> The Brillouin zone integration was performed by using the k-point sampling of the Monkhorst-Pack scheme with a  $2 \times 2 \times 9$  grid.<sup>16</sup> The convergence criterion of energy and structural relaxation were set as less than  $1.0 \times 10^{-6}$  eV and  $0.02 \text{ eV \AA}^{-1}$ , respectively.

### Section S3. Results and Discussion

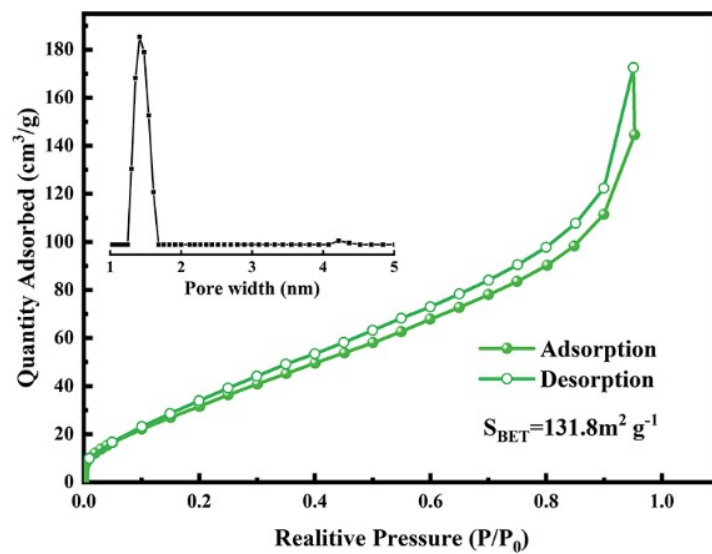

**Figure S1.** N<sub>2</sub> adsorption-desorption isotherms and pore distribution of Cu-DBC.

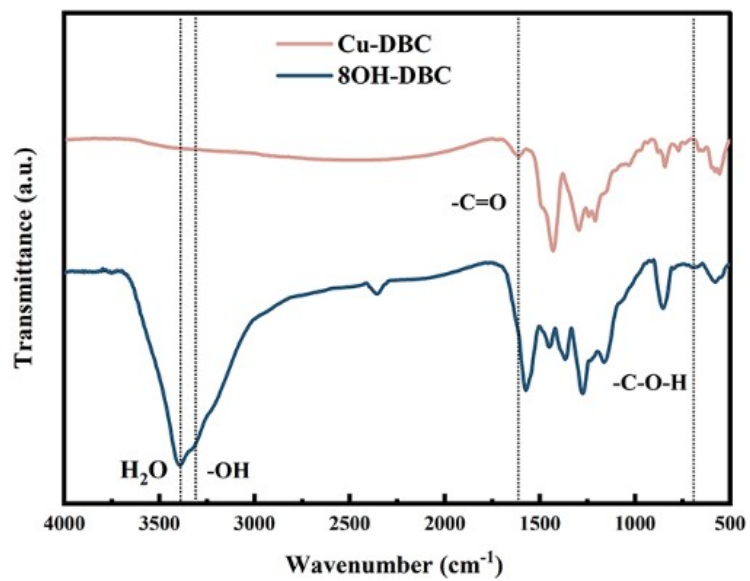

**Figure S2.** FT-IR spectra of Cu-DBC and 8OH-DBC.



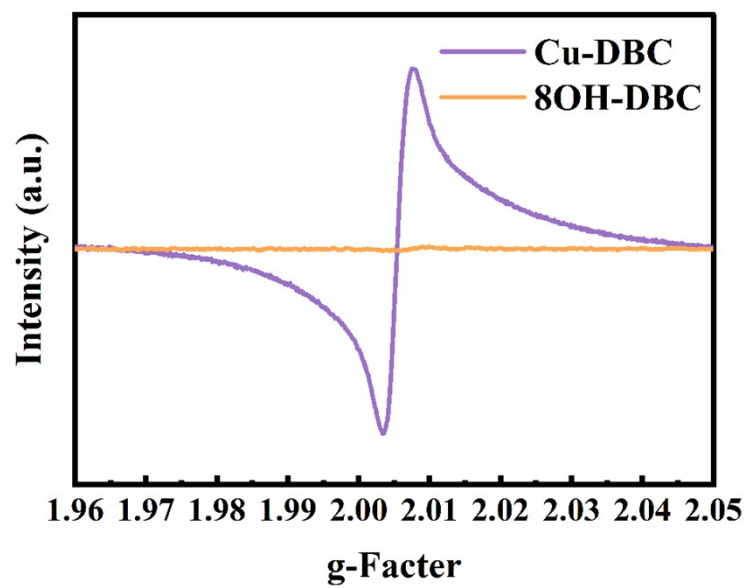

**Figure S3.** EPR spectra of 8OH-DBC and Cu-DBC.

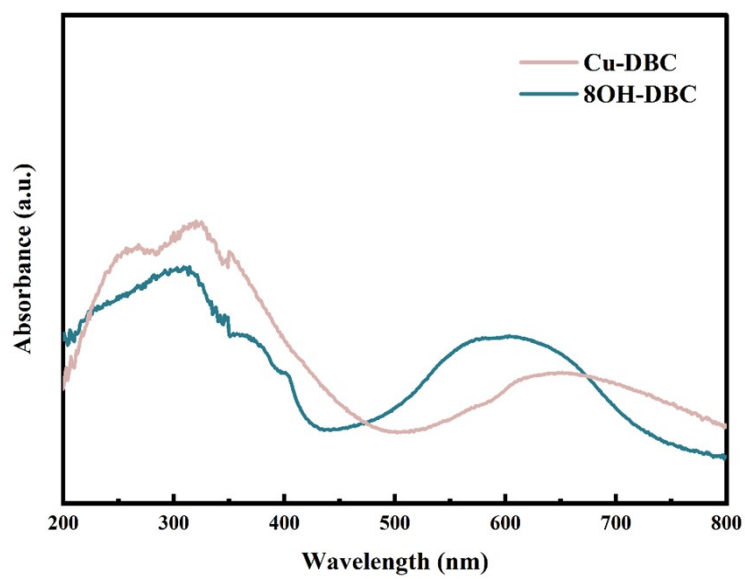

**Figure S4.** UV-vis spectra of Cu-DBC and 8OH-DBC.

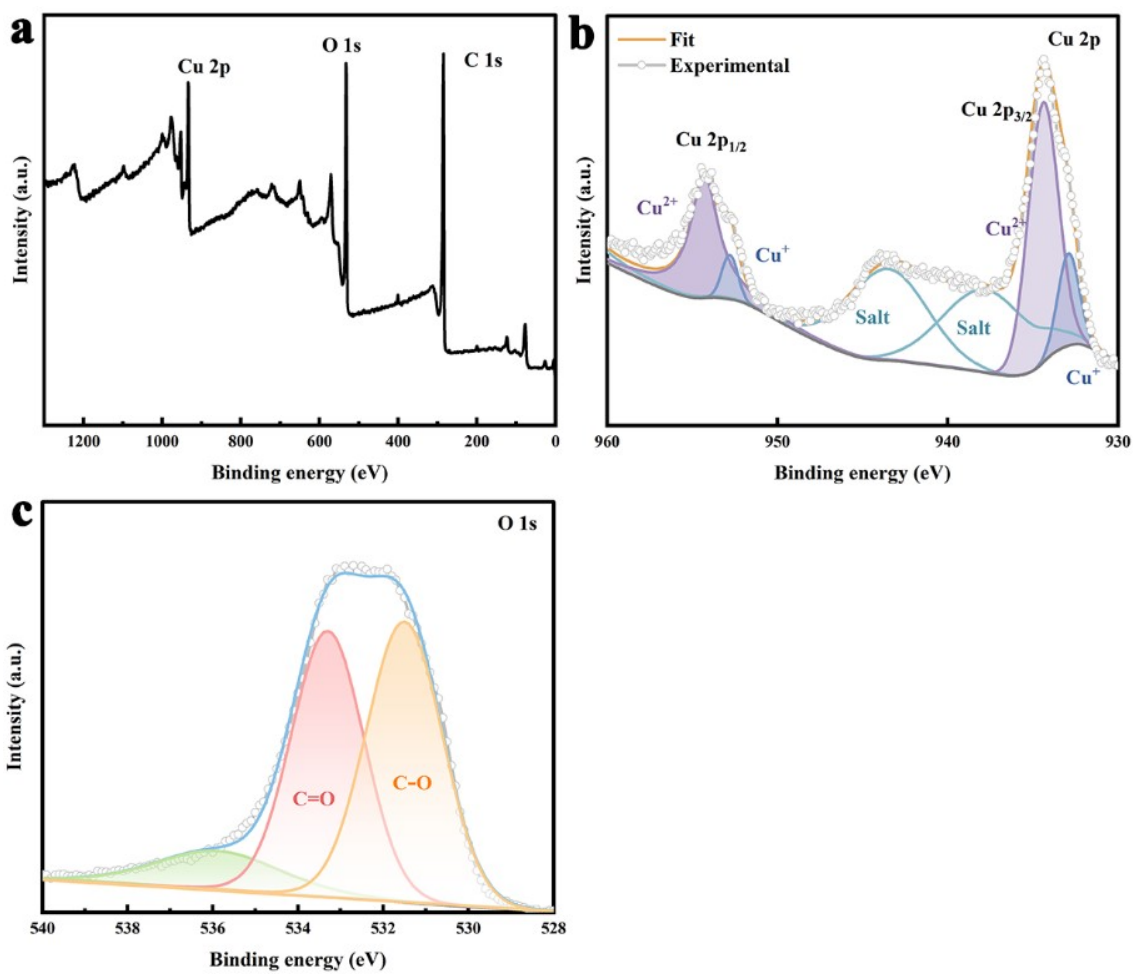

**Figure S5.** (a) The XPS survey spectrum of Cu-DBC and XPS spectra of (b) Cu 2p and (c) O 1s.

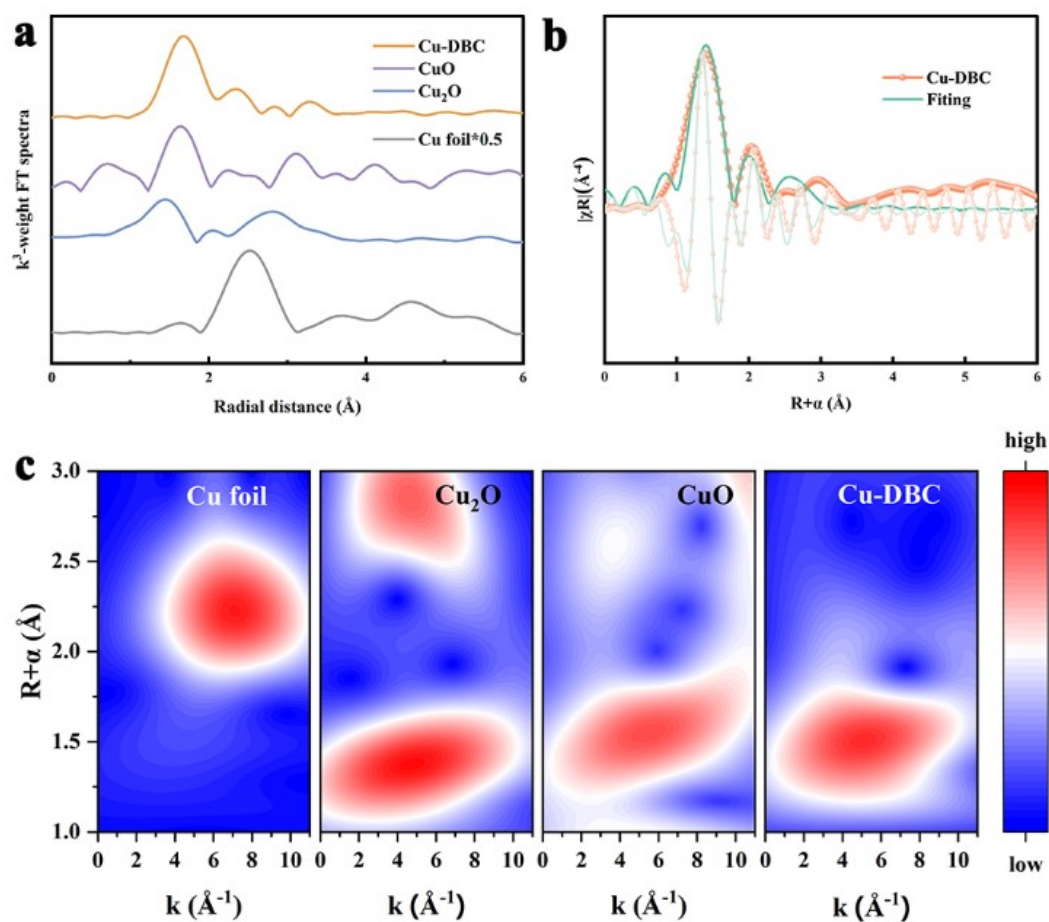

**Figure S6.** (a)  $k^3$ -weighted FT spectra for Cu-DBC, CuO,  $\text{Cu}_2\text{O}$  and Cu foil. (b)  $k^3$ -weighted FT-EXAFS experimental and fitting curves of Cu-DBC. (c) Wavelet transform for Cu-DBC, CuO,  $\text{Cu}_2\text{O}$  and Cu foil.

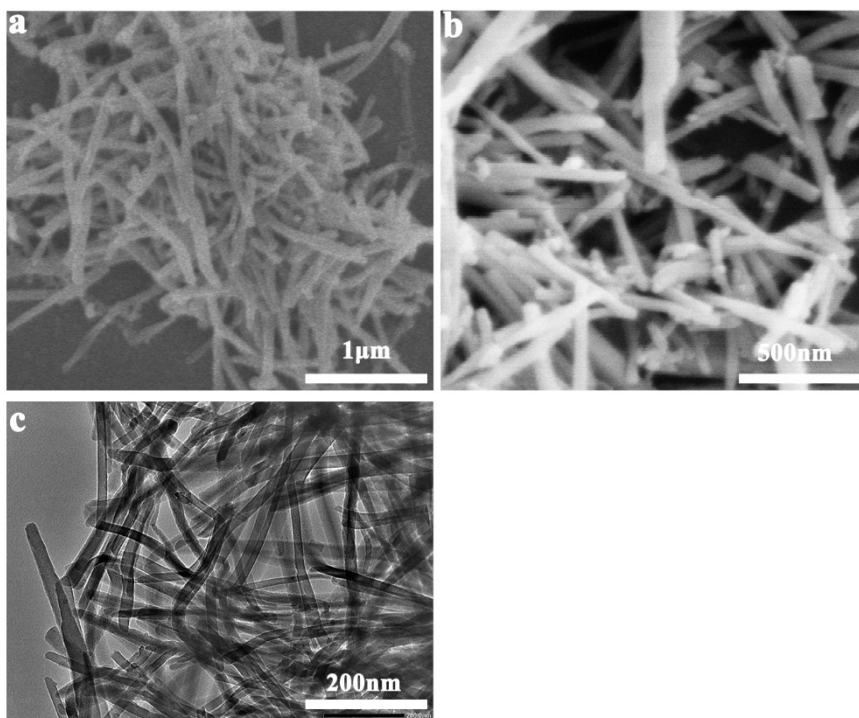

**Figure S7.** SEM (a-b) and HRTEM (c) images of Cu-DBC.

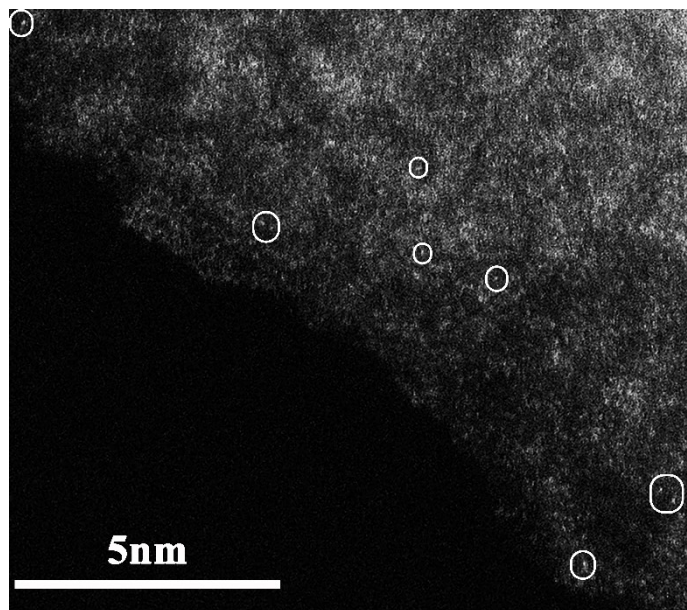

**Figure S8.** HAADF-STEM image of Cu-DBC.

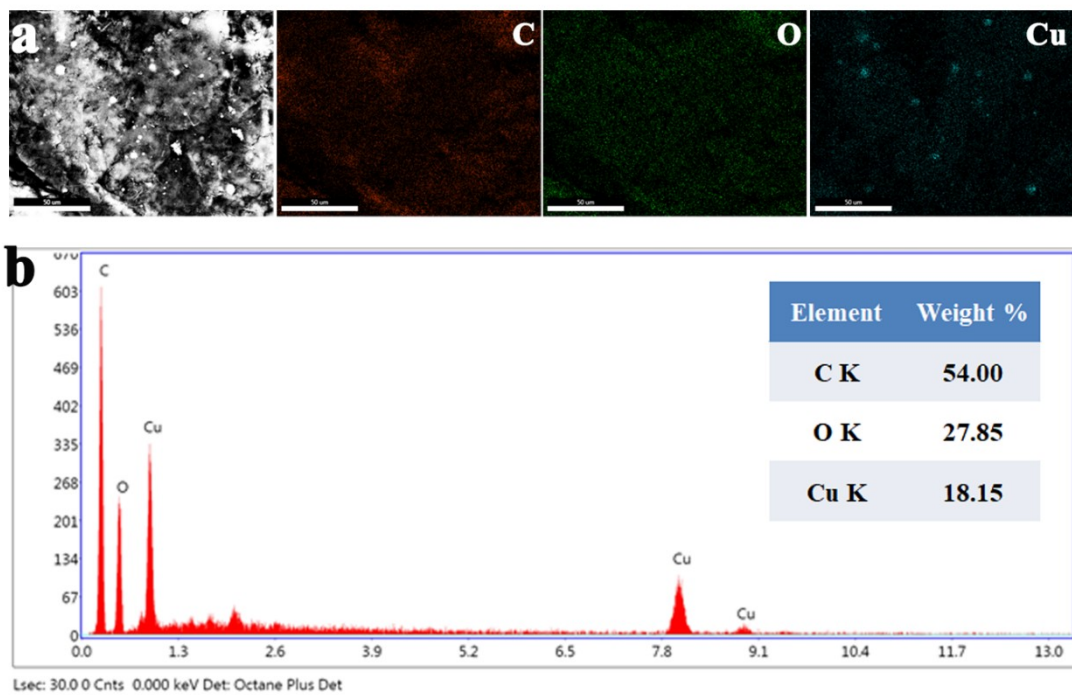

**Figure S9.** (a) SEM image of Cu-DBC and corresponding element mapping images of C, O, and Cu. (b) The corresponding energy dispersive X-ray spectra of Cu-DBC.

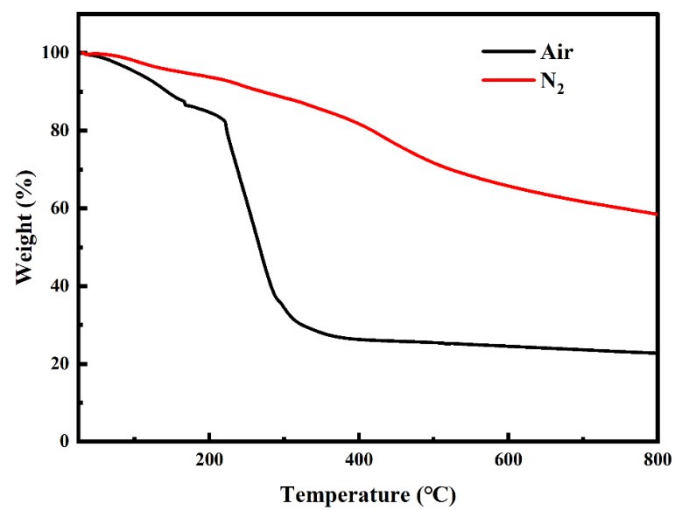

**Figure S10.** TGA curves of Cu-DBC under Air and N<sub>2</sub> atmosphere.



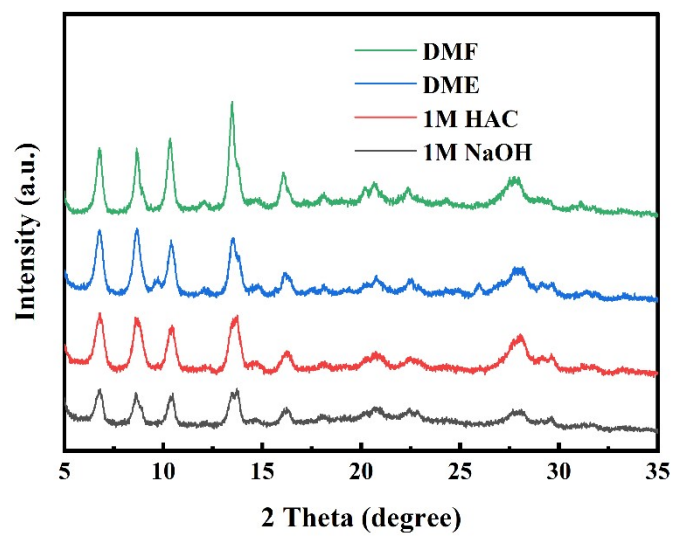

**Figure S11.** PXRD patterns of Cu-DBC after soaking in organic solvents (DMF), electrolytes (DME), NaOH (1 M) and HAC (1 M).

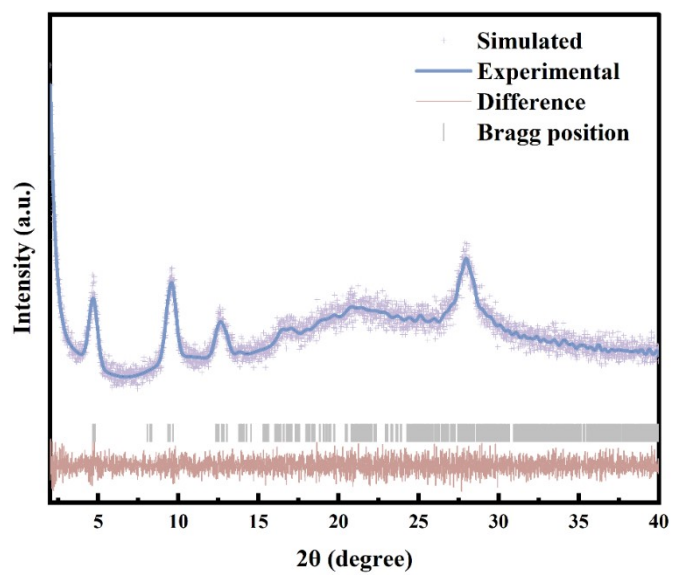

**Figure S12.** PXRD patterns of Cu-HHTP.

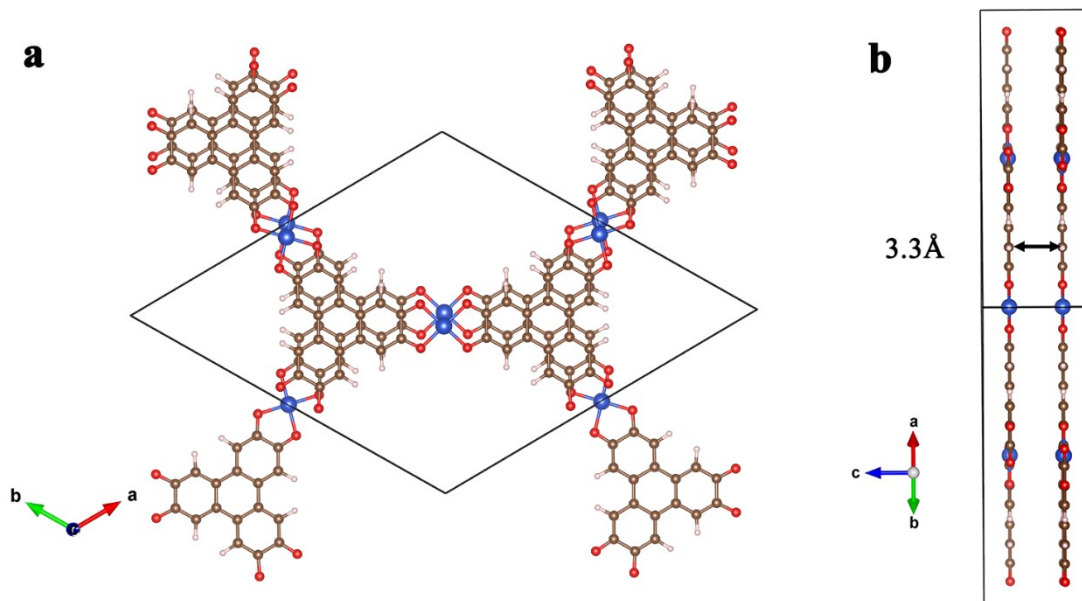

**Figure S13.** Top view (a) and side view (b) of Cu-HHTP unit cell.

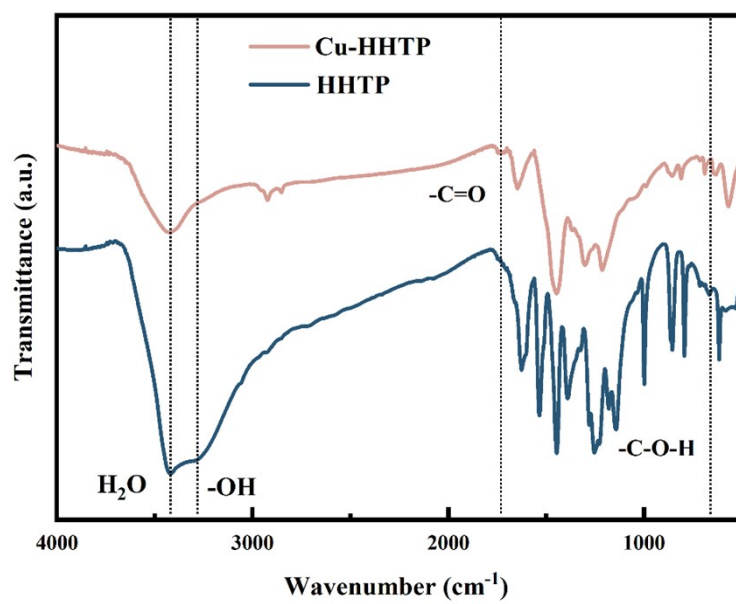

**Figure S14.** FT-IR spectra of Cu-HHTP and HHTP.

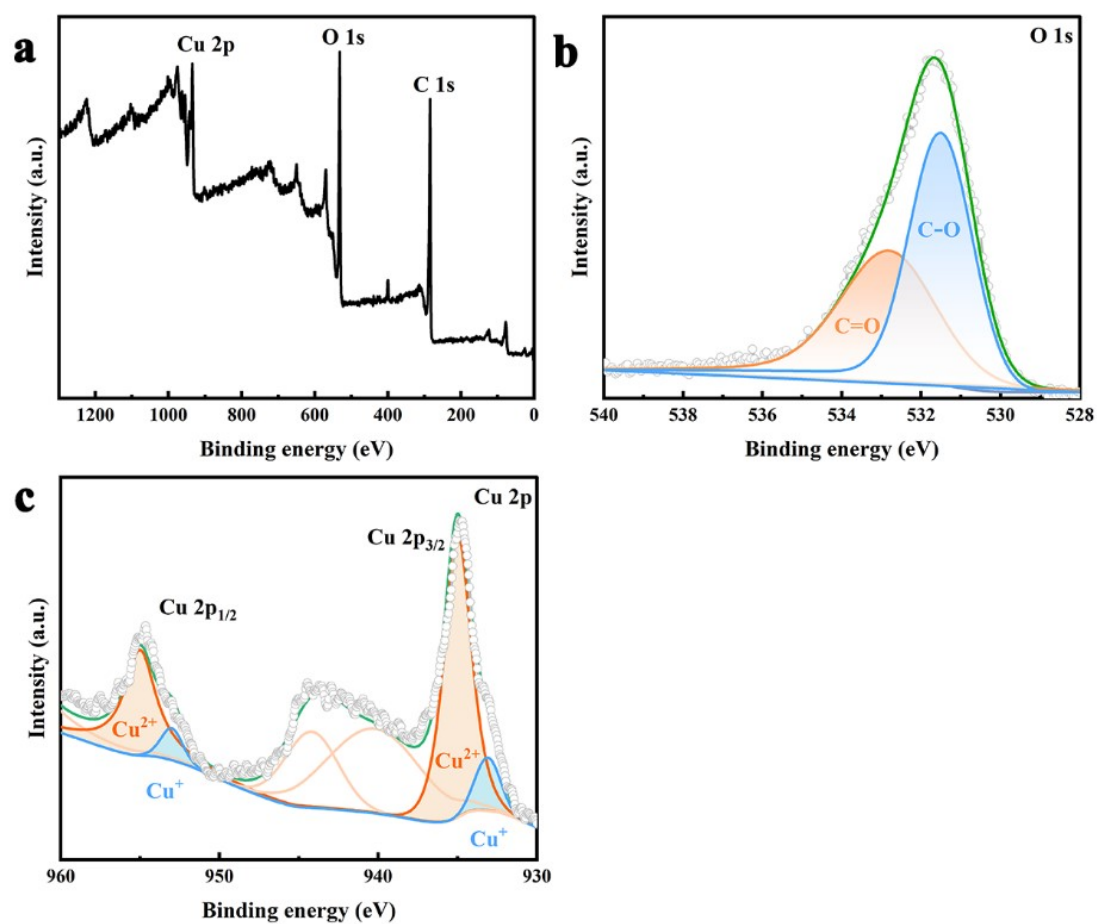

**Figure S15.** (a) The XPS survey spectrum of Cu-HHTP and XPS spectra of (b) O1s and (c) Cu 2p.

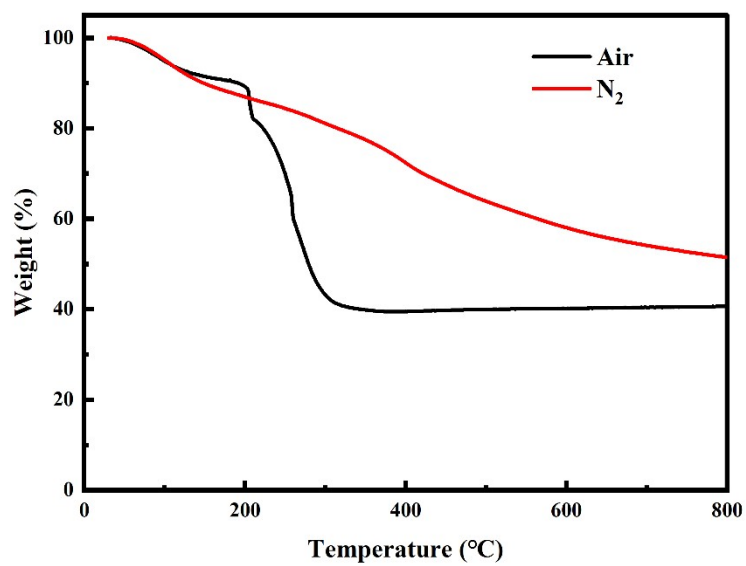

**Figure S16.** TGA curves of Cu-HHTP at Air and N<sub>2</sub> atmosphere.

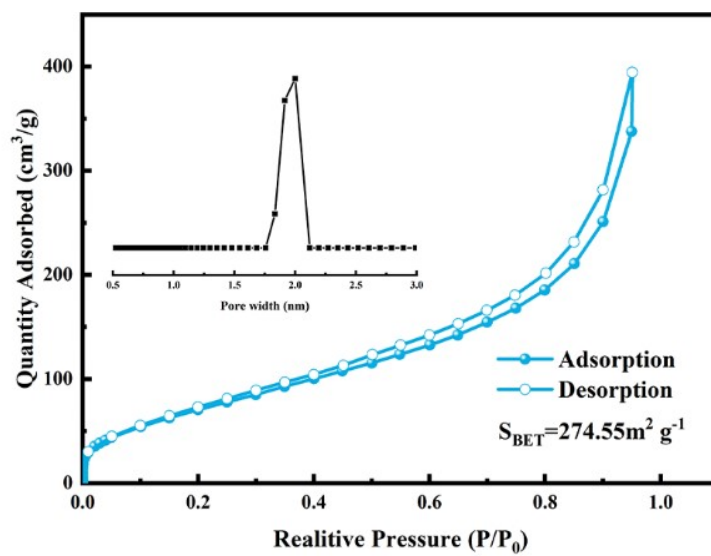

**Figure S17.** N<sub>2</sub> adsorption-desorption isotherms and pore distribution of Cu-HHTP.

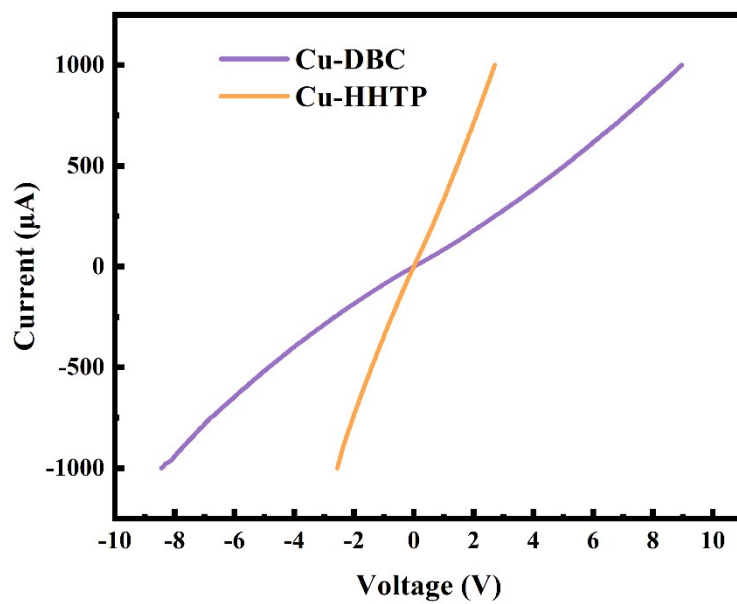

**Figure S18.** Current-voltage characteristic of Cu-DBC and Cu-HHTP using the two probe method.



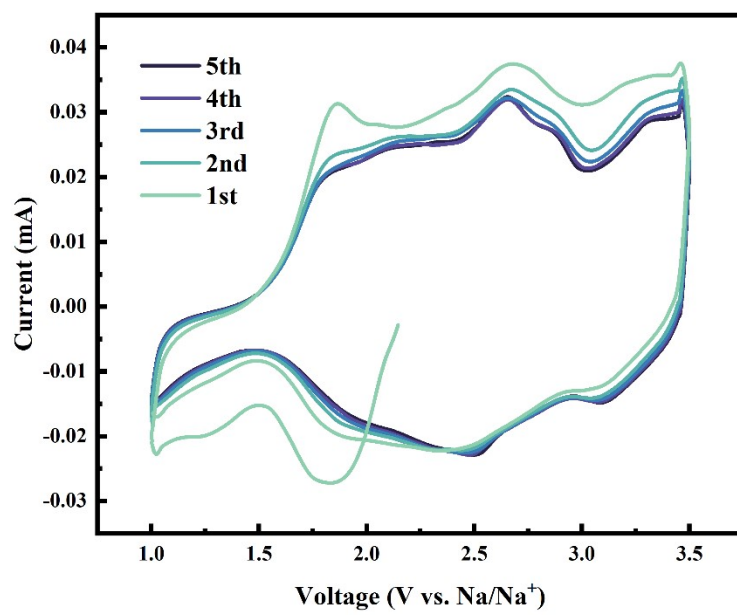

**Figure S19.** CV curves of Cu-HHTP at 0.1 mV s<sup>-1</sup>.

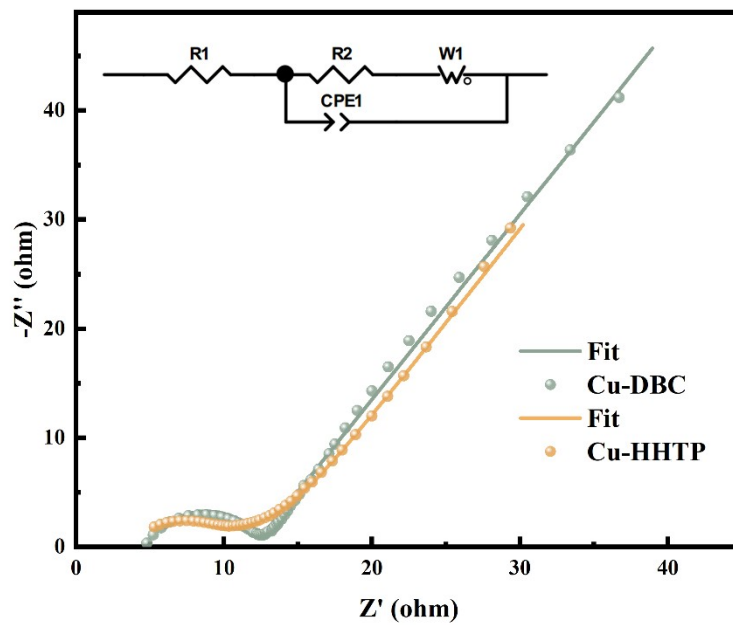

**Figure S20.** Electrochemical impedance spectra of pristine Cu-DBC and Cu-HHTP.

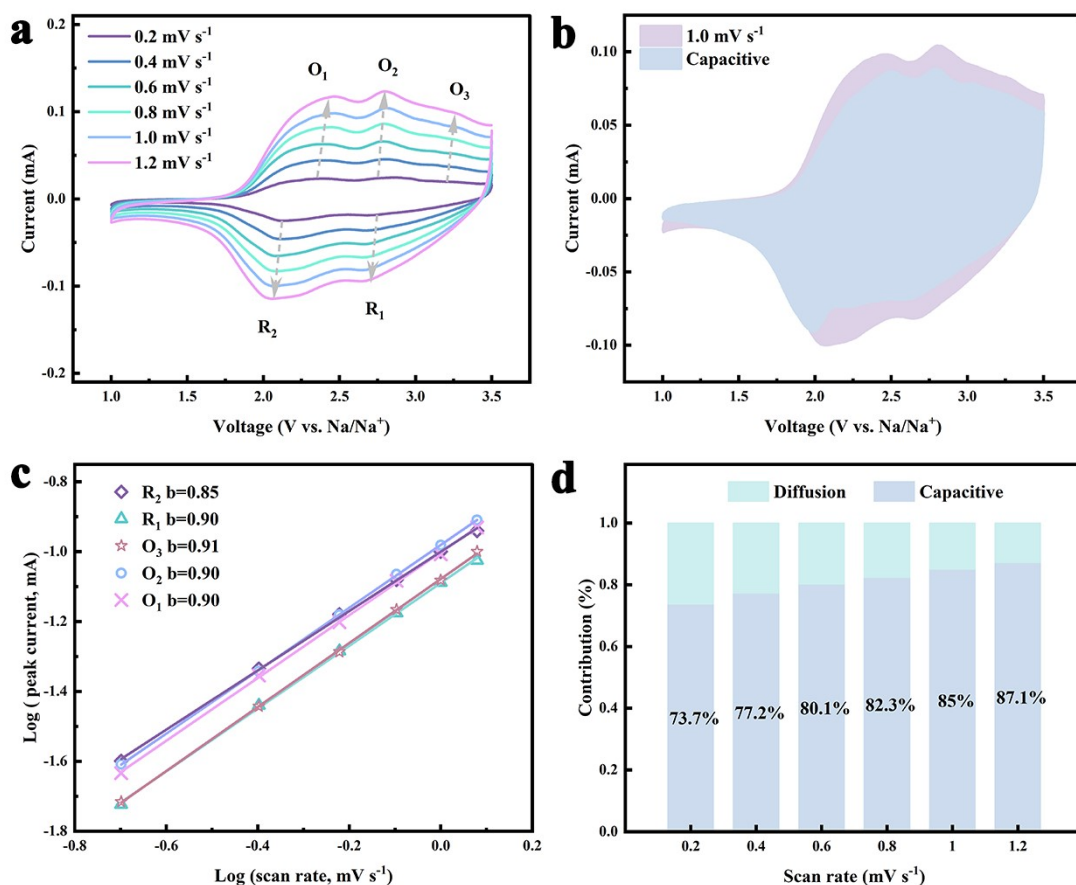

**Figure S21.** (a) CV curves of Cu-DBC recorded at different scan rates. (b) Capacitive and diffusion-controlled contribution at  $1.0 \text{ mV s}^{-1}$ . (c) b-value calculated by fitting the plots of  $\log(i)$  versus  $\log(v)$ . (d) The contribution ratio of the capacitive capacities and diffusion-controlled capacities at different scan rates.

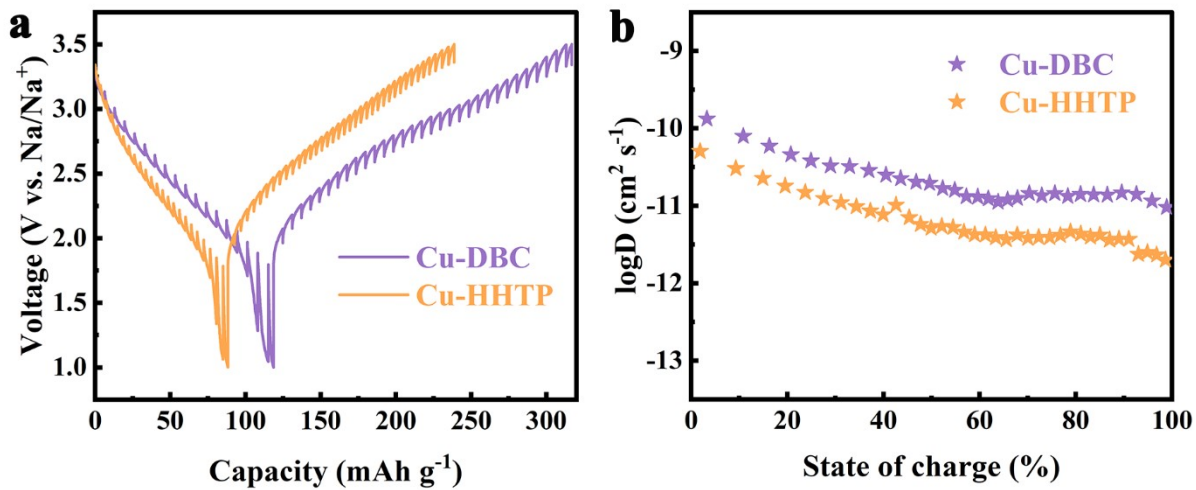

**Figure S22.** (a) GITT curves of Cu-DBC and Cu-HHTP. (b) LogD ( $D = \text{Na}^+$  diffusion coefficient calculated by GITT) of Cu-DBC and Cu-HHTP at the charging state.

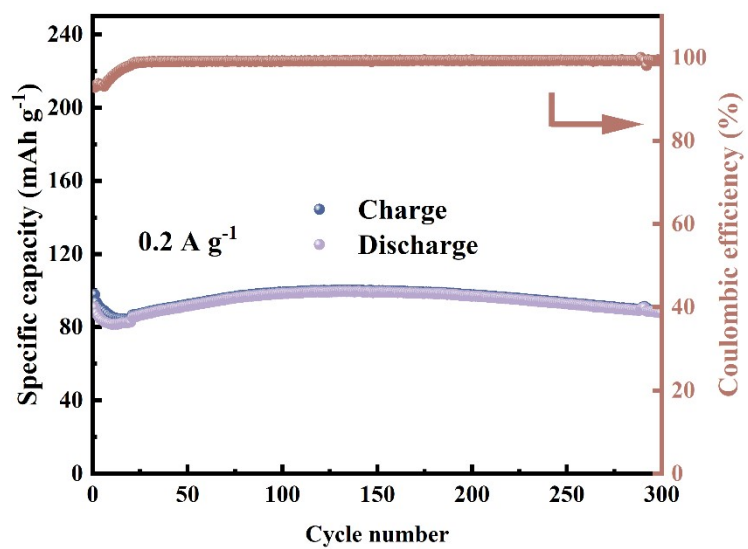

**Figure S23.** Cycle stability of Cu-DBC with mass-loading of 2.5 mg cm<sup>-2</sup> at 0.2 A g<sup>-1</sup>.

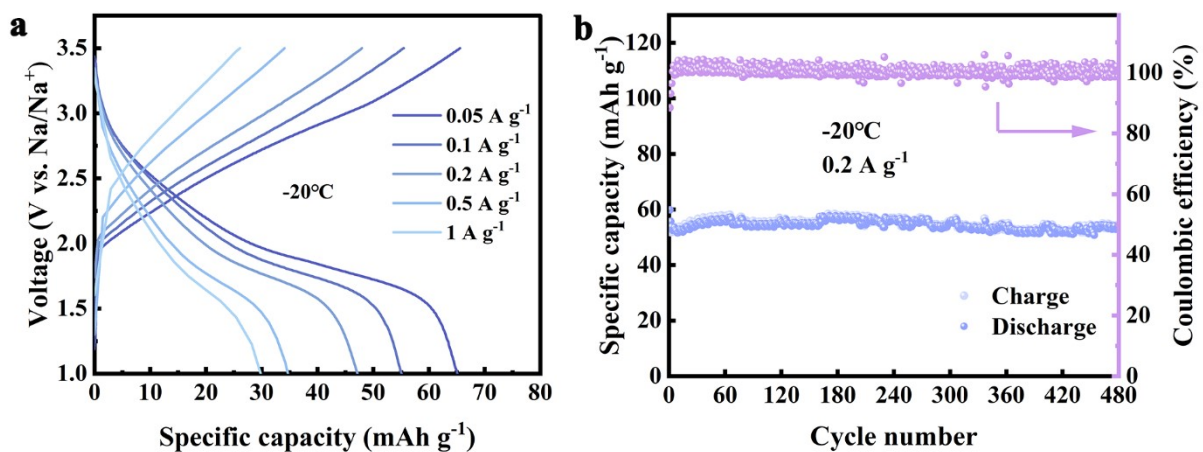

**Figure S24.** (a) Galvanostatic charge/discharge profiles of Cu-DBC at -20 °C. (b) Cycle stability of Cu-DBC at -20 °C.

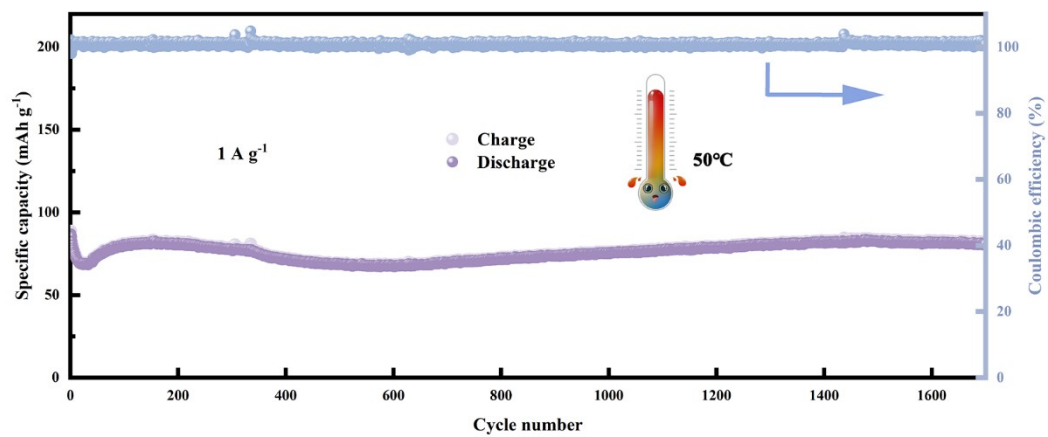

**Figure S25.** cycle stability of Cu-DBC at 50 °C.

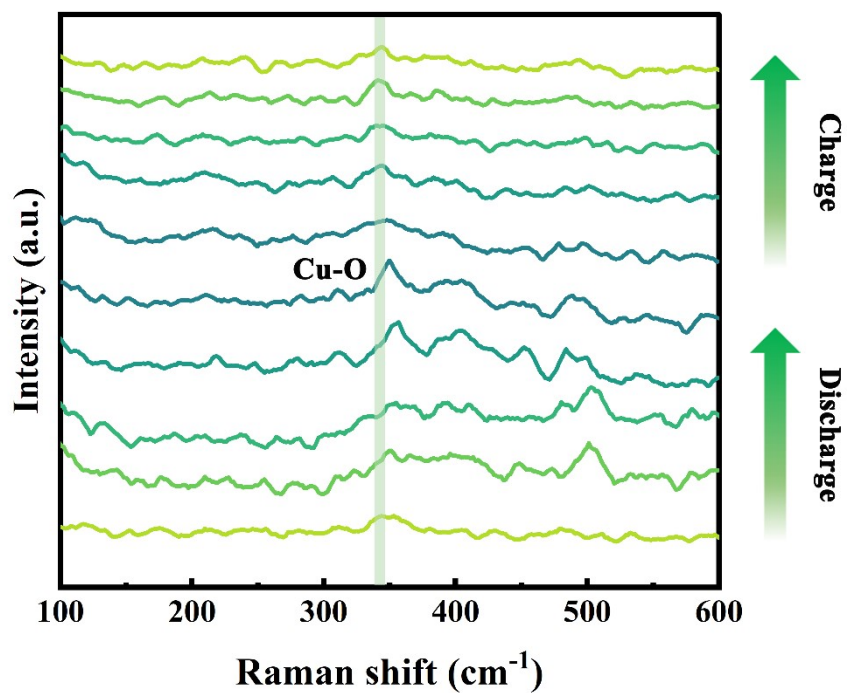

**Figure S26.** *In situ* Raman spectra of Cu-DBC during the GCD process (the peaks near the shadow are attributed to the stretching vibrations of Cu-O).



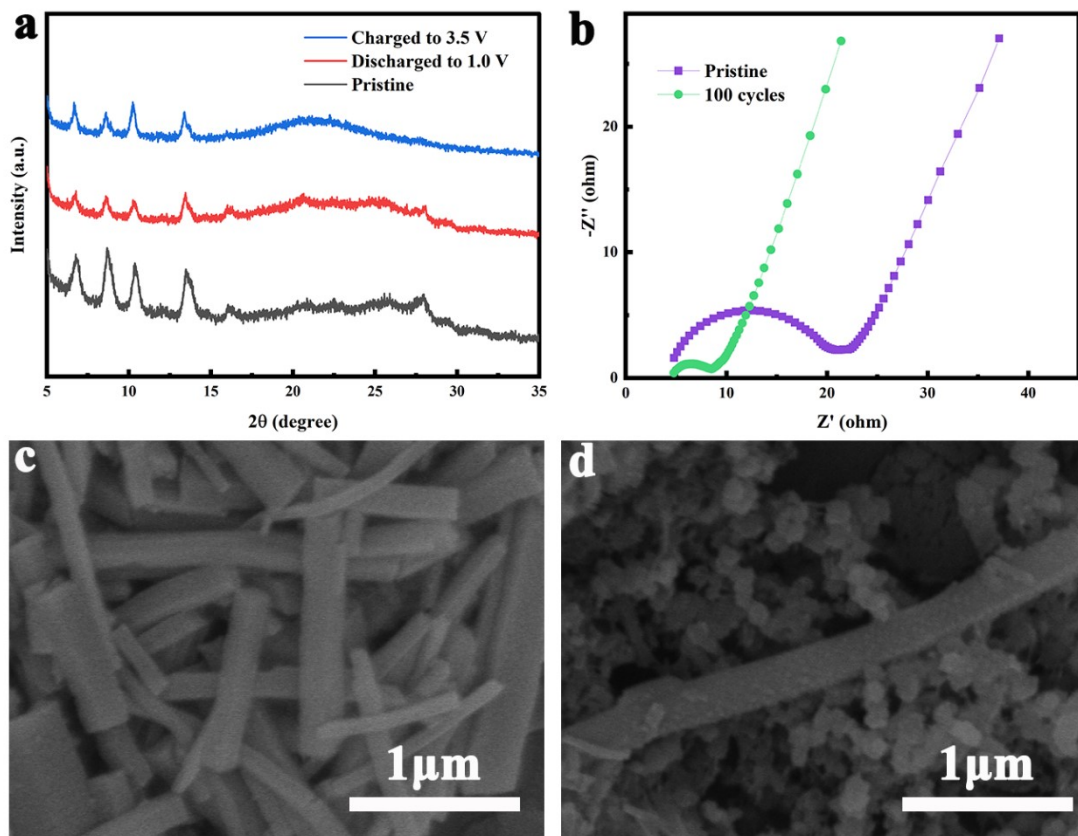

**Figure S27.** (a) *Ex-situ* PXRD patterns of Cu-DBC cathode during the GCD process. (b) Electrochemical impedance spectra of Cu-DBC cathodes after long cycles. The SEM images of Cu-DBC before (c) and after (d) 100 cycles.

**Table S1.** EXAFS fitting parameters at the Cu K-edge for Cu-DBC.

| Sample | Shell | N    | R(Å) | $\sigma^2(\text{Å}^2)$ | $E_0$ | R factor |
|--------|-------|------|------|------------------------|-------|----------|
| Cu-DBC | Cu-O  | 3.37 | 1.92 | 0.00132                | 0.857 | 0.023    |
|        | Cu-O  | 1.80 | 2.12 | 0.00132                | 0.857 |          |
|        | Cu-C  | 2.41 | 3.27 | 0.00132                | 0.857 |          |

N, coordination number; R, the distance to the neighboring atom;  $\sigma^2$ , the Mean Square Relative Displacement (MSRD);  $E_0$ , inner potential correction; R factor indicates the goodness of the fit.

**Table S2.** Comparison of electrochemical performance between the typical cathodes and Cu-DBC cathode for SIBs.

|                                                                                    | Capacity [mAh g <sup>-1</sup> @mA g <sup>-1</sup> ] | Cycle life [cycles, retention%@ A g <sup>-1</sup> ] | Rate performance [mAh g <sup>-1</sup> @ A g <sup>-1</sup> ] | active material content | Refs.     |
|------------------------------------------------------------------------------------|-----------------------------------------------------|-----------------------------------------------------|-------------------------------------------------------------|-------------------------|-----------|
| Na <sub>3</sub> V <sub>1.5</sub> Cr <sub>0.5</sub> (PO <sub>4</sub> ) <sub>3</sub> | 163@15                                              | 2650, 72@0.75                                       | 128@1.5                                                     | 80%                     | 17        |
| NMTVP                                                                              | 118.5@12                                            | 4500,86@0.6                                         | 59.3@0.6                                                    | 70%                     | 18        |
| O3-NNAMO                                                                           | 110@17                                              | 200,86@0.085                                        | 20@1.7                                                      | 70%                     | 19        |
| Na <sub>2/3</sub> Ni <sub>1/3</sub> Mn <sub>2/3</sub> O <sub>2</sub>               | 89@17.3                                             | 1200,71.2@1.73                                      | 58.2@3.5                                                    | 80%                     | 20        |
| MnNi-PB                                                                            | 93.9@15                                             | 700,85.3@0.75                                       | 69.4@15                                                     | 70%                     | 21        |
| Ni <sub>3</sub> (HATQ) <sub>2</sub>                                                | 108.1@100                                           | 1000,95@1                                           | 77.1@2                                                      | 60%                     | 22        |
| Cu-TBA                                                                             | 153.6@50                                            | 3000,100@1                                          | 50.1@5                                                      | 40%                     | 23        |
| Co <sub>2</sub> (TTFTB)                                                            | 195@100                                             | 200,42@0.1                                          | 40@1                                                        | 30%                     | 24        |
| NiCoFe-PBA                                                                         | 145@15                                              | 600,90@0.75                                         | 90@1.5                                                      | 70%                     | 25        |
| UiO-abdc                                                                           | 100@10                                              | 150,100@0.01                                        | 35@1                                                        | 60%                     | 26        |
| Cu -DBC                                                                            | 120.6@50                                            | 4000,81.9@2                                         | 77@5                                                        | 60%                     | This work |
| Cu -DBC                                                                            | 104.4@50                                            | 1100,67@1                                           | 15.5@5                                                      | 80%                     | This work |
| Na <sub>2</sub> C <sub>6</sub> O <sub>6</sub>                                      | 190.0@25                                            | 100,95@0.025                                        | 95.0@0.25                                                   | 70%                     | 27        |
| PTCDA                                                                              | 145@10                                              | 200,80@0.2                                          | 91@1                                                        | 70%                     | 28        |
| PYT-TABQ /rGO                                                                      | 245@200                                             | 1400,98@1                                           | 141.5@8                                                     | 60%                     | 29        |
| PTCDI                                                                              | 140@10                                              | 300,90@0.2                                          | 103@0.6                                                     | 70%                     | 30        |
| Hollow PPY                                                                         | 97@20                                               | 1000,78.5@0.4                                       | 87@0.32                                                     | 80%                     | 31        |

## Section S4. References

- [1] J. Liu, Y. Zhou, Z. Xie, Y. Li, Y. Liu, J. Sun, Y. Ma, O. Terasaki, L. Chen, *Angew. Chem.-Int. Edit.*, 2020, **59**, 1081-1086.
- [2] Y. Chen, Q. Zhu, K. Fan, Y. Gu, M. Sun, Z. Li, C. Zhang, Y. Wu, Q. Wang, S. Xu, J. Ma, C. Wang, W. Hu, *Angew. Chem.-Int. Edit.*, 2021, **60**, 18769-18776.
- [3] M. J. Frisch, G. W. Trucks, H. B. Schlegel, G. E. Scuseria, M. A. Robb, J. R. Cheeseman, G. Scalmani, V. Barone, G. A. Petersson, H. Nakatsuji, X. Li, M. Caricato, A. V. Marenich, J. Bloino, B. G. Janesko, R. Gomperts, B. Mennucci, H. P. Hratchian, J. V. Ortiz, A. F. Izmaylov, J. L. Sonnenberg, Williams, F. Ding, F. Lipparini, F. Egidi, J. Goings, B. Peng, A. Petrone, T. Henderson, D. Ranasinghe, V. G. Zakrzewski, J. Gao, N. Rega, G. Zheng, W. Liang, M. Hada, M. Ehara, K. Toyota, R. Fukuda, J. Hasegawa, M. Ishida, T. Nakajima, Y. Honda, O. Kitao, H. Nakai, T. Vreven, K. Throssell, Jr. J. A. Montgomery, J. E. Peralta, F. Ogliaro, M. J. Bearpark, J. J. Heyd, E. N. Brothers, K. N. Kudin, V. N. Staroverov, T. A. Keith, R. Kobayashi, J. Normand, K. Raghavachari, A. P. Rendell, J. C. Burant, S. S. Iyengar, J. Tomasi, M. Cossi, J. M. Millam, M. Klene, C. Adamo, R. Cammi, J. W. Ochterski, R. L. Martin, K. Morokuma, O. Farkas, J. B. Foresman, D. J. Fox, Gaussian 16 Revision C.01, Gaussian Inc., Wallingford CT, 2016.
- [4] C. Lee, W. Yang, R. G. Parr, *Phys. Rev. B*, 1988, **37**, 785-789.
- [5] A. D. Becke, *Phys. Rev. A*, 1988, **38**, 3098-3100.
- [6] F. Weigend, R. Ahlrichs, *Phys. Chem. Chem. Phys.*, 2005, **7**, 3297-3305.
- [7] T. Lu, F. Chen, *J. Comput. Chem.*, 2012, **33**, 580-92.
- [8] W. Humphrey, A. Dalke, K. Schulten, *J. Mol. Graphics*, 1996, **14**, 33-38.
- [9] G. Kresse, J. Furthmüller, *Comput. Mater. Sci.*, 1996, **6**, 15-50.
- [10] G. Kresse, J. Furthmüller, *Phys. Rev. B*, 1996, **54**, 11169-11186.
- [11] I.-H. Lee, R. M. Martin, *Phys. Rev. B*, 1997, **56**, 7197-7205.
- [12] J. P. Perdew, K. Burke, M. Ernzerhof, *Phys. Rev. Lett.*, 1996, **77**, 3865-3868.
- [13] S. Grimme, *J. Comput. Chem.*, 2006, **27**, 1787-1799.
- [14] A. I. Liechtenstein, V. I. Anisimov, J. Zaanen, *Phys. Rev. B*, 1995, **52**, R5467-R5470.
- [15] L. Wang, T. Maxisch, G. Ceder, *Phys. Rev. B*, 2006, **73**, 195107.
- [16] H. J. Monkhorst, J. D. Pack, *Phys. Rev. B*, 1976, **13**, 5188-5192.
- [17] M. Chen, W. Hua, J. Xiao, J. Zhang, V. W. Lau, M. Park, G. H. Lee, S. Lee, W. Wang, J. Peng, L. Fang, L. Zhou, C. K. Chang, Y. Yamauchi, S. Chou, Y. M. Kang, *J. Am. Chem. Soc.*, 2021, **143**, 18091-18102.

- [18] P. Hu, C. Cai, X. Li, Z. Wei, M. Wang, C. Chen, T. Zhu, L. Mai, L. Zhou, *Adv. Funct. Mater.*, 2024, **34**, 2302045.
- [19] B. Peng, Y. Chen, L. Zhao, S. Zeng, G. Wan, F. Wang, X. Zhang, W. Wang, G. Zhang, *Energy Storage Mater.*, 2023, **56**, 631-641.
- [20] Q. Liu, Z. Hu, M. Chen, C. Zou, H. Jin, S. Wang, Q. Gu, S. Chou, *J. Mater. Chem. A*, 2019, **7**, 9215-9221.
- [21] Z. Xu, Y. Sun, J. Xie, Y. Nie, X. Xu, J. Tu, J. Zhang, L. Qiu, T. Zhu, X. Zhao, *ACS Sustain. Chem. Eng.*, 2022, **10**, 13277-13287.
- [22] D. Chen, L. Cheng, W. Chen, H. G. Wang, F. Cui, L. Chen, *Chem. Sci.*, 2024, **15**, 11564-11571.
- [23] M. Qi, L. Cheng, H. G. Wang, F. Cui, Q. Yang, L. Chen, *Adv. Mater.*, 2024, **36**, e2401878.
- [24] K. Wakamatsu, S. Furuno, Y. Yamaguchi, R. Matsushima, T. Shimizu, N. Tanifuji, H. Yoshikawa, *ACS Appl. Energ. Mater.*, 2023, **6**, 9124-9135.
- [25] J. Peng, J. Wang, H. Yi, W. Hu, Y. Yu, J. Yin, Y. Shen, Y. Liu, J. Luo, Y. Xu, P. Wei, Y. Li, Y. Jin, Y. Ding, L. Miao, J. Jiang, J. Han, Y. Huang, *Adv. Energy Mater.*, 2018, **8**, 1702856.
- [26] A. V. Desai, V. R. Seymour, R. Ettliger, A. Pramanik, A. G. Manche, D. N. Rainer, P. S. Wheatley, J. M. Griffin, R. E. Morris, A. R. Armstrong, *Chem. Commun.*, 2023, **59**, 1321-1324.
- [27] Y. Wang, Y. Ding, L. Pan, Y. Shi, Z. Yue, Y. Shi, G. Yu, *Nano Lett.*, 2016, **16**, 3329-3334.
- [28] W. Luo, M. Allen, V. Raju, X. Ji, *Adv. Energy Mater.*, 2014, **4**, 1400554.
- [29] Y. Chen, H. Li, M. Tang, S. Zhuo, Y. Wu, E. Wang, S. Wang, C. Wang, W. Hu, *J. Mater. Chem. A*, 2019, **7**, 20891-20898.
- [30] W. Deng, Y. Shen, J. Qian, Y. Cao, H. Yang, *ACS Appl. Mater. Interfaces*, 2015, **7**, 21095-21099.
- [31] D. Su, J. Zhang, S. Dou, G. Wang, *Chem. Commun.*, 2015, **51**, 16092-16095.
